# Supplementary material for: A self-activating electron transfer antibacterial strategy: Co3O4/TiO2 P–N heterojunctions combined with photothermal therapy
Source: Royal Society of Chemistry journal article supplement (doi:10.1039/d3bm01550e), 2024-01-01
Supplement: d3bm01550e1.pdf [file d3bm01550e1.pdf]

## Supplementary Information

### Self-activating electron transfer antibacterial strategy: $\text{Co}_3\text{O}_4/\text{TiO}_2$ P-N heterojunction combined with photothermal therapy

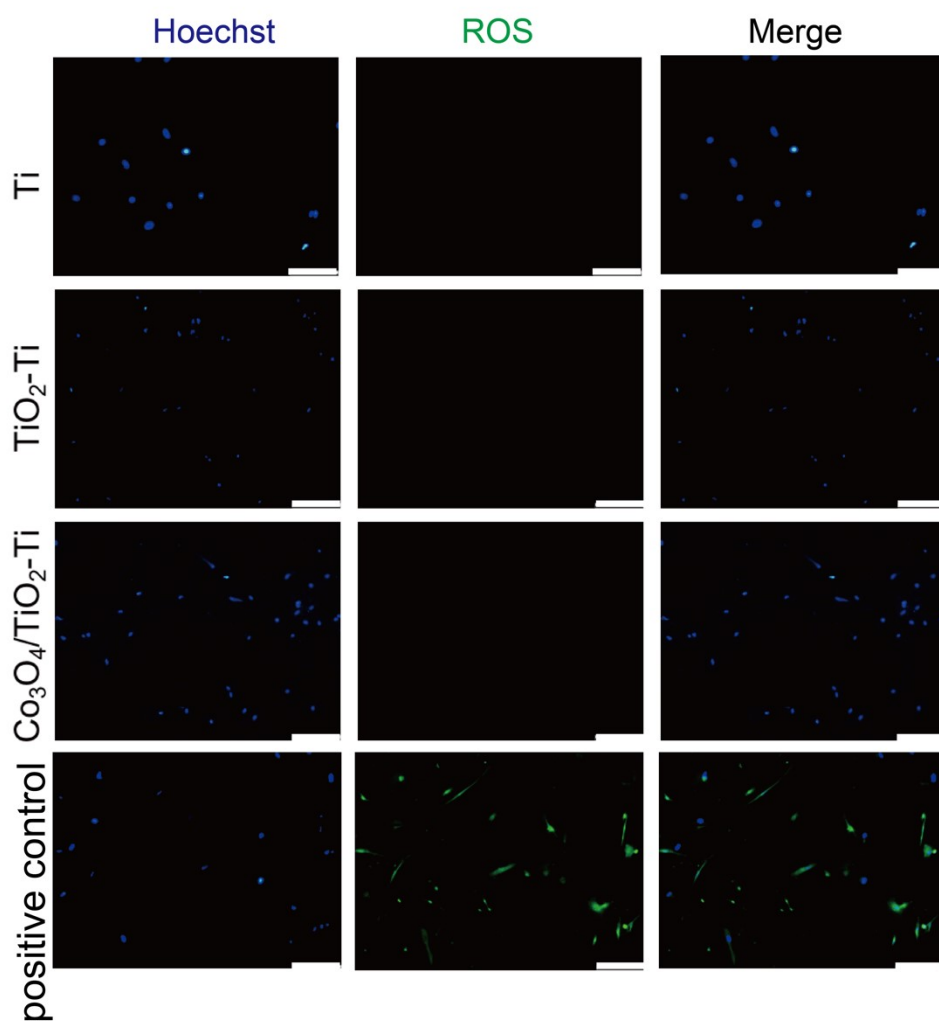

**Figure S1.** Cellular ROS production induced by the samples. Scale bar = 100  $\mu\text{m}$ .

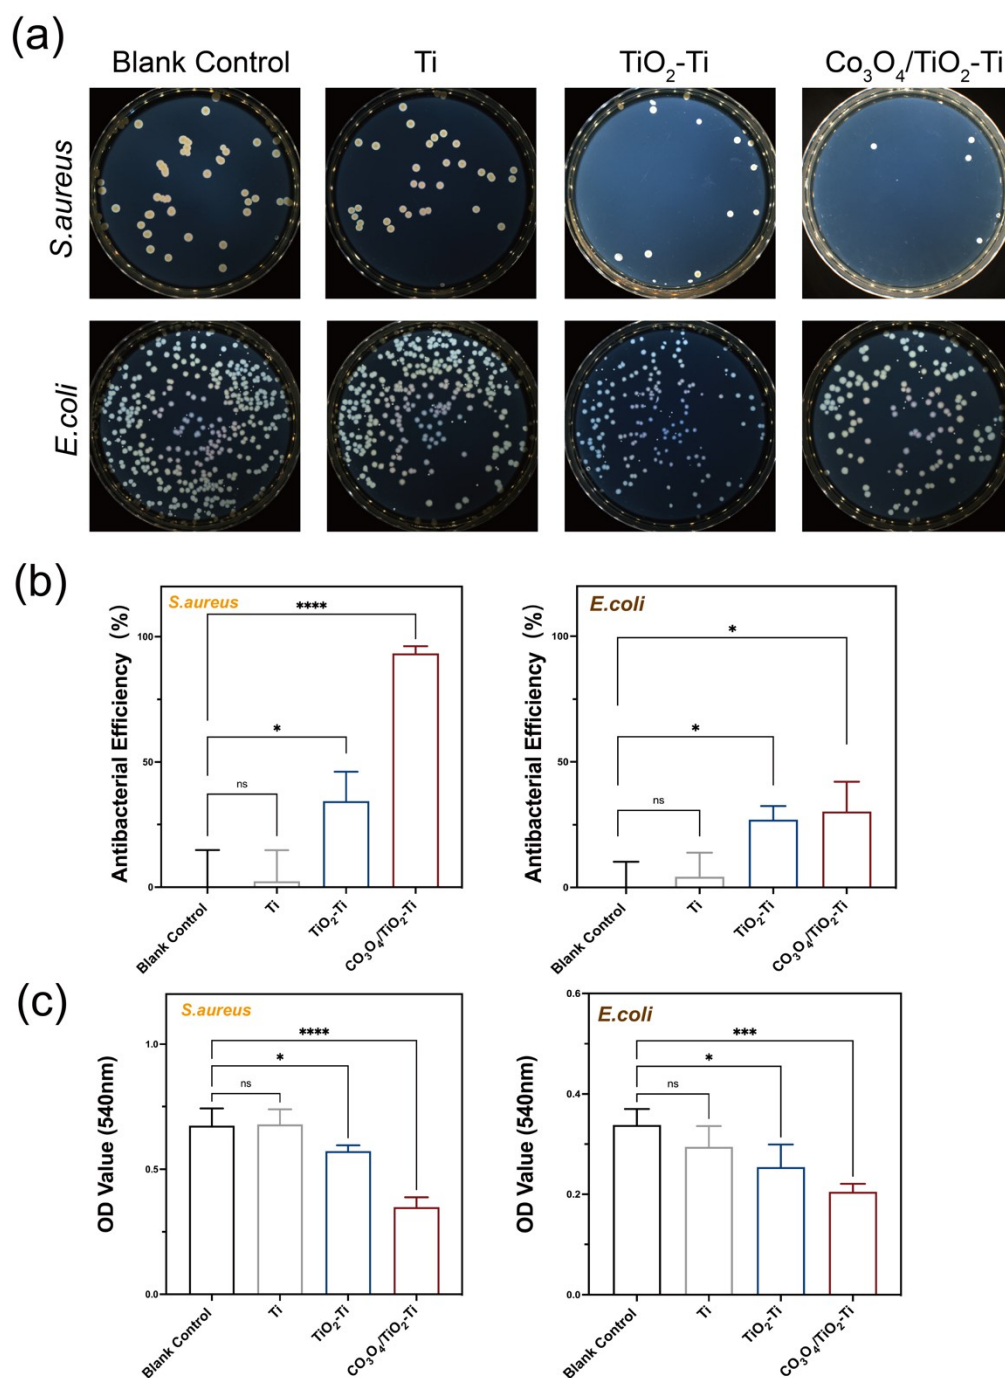

**Figure S2.** a) Representative images of adhesive *S. aureus* and *E. coli* bacterial colonies following 6-hour cultivation with a blank control, Ti, TiO<sub>2</sub>-Ti, and Co<sub>3</sub>O<sub>4</sub>/TiO<sub>2</sub>-Ti. b) Antibacterial efficacy of the samples after 6 h incubation. c) Bacterial viability when cultured on the samples for 6 h. Error bars represent SD (n = 3). \**p* < 0.05, \*\*\**p* < 0.001, \*\*\*\**p* < 0.0001, *ns*: no statistical significance.

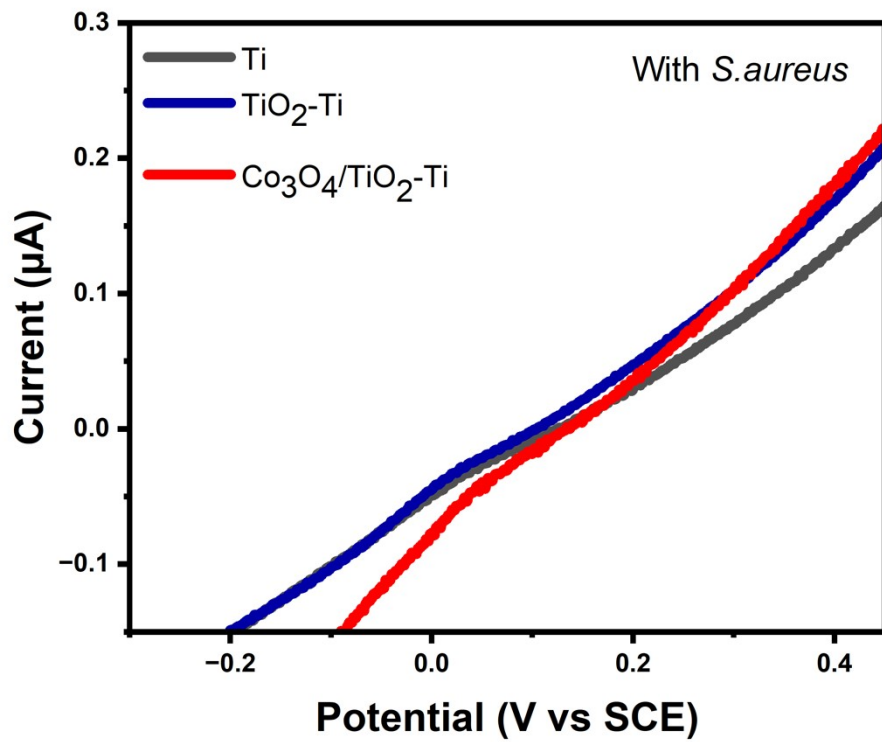

**Figure S3.** Comparative plot of current curves generated by different samples without *S. aureus*.

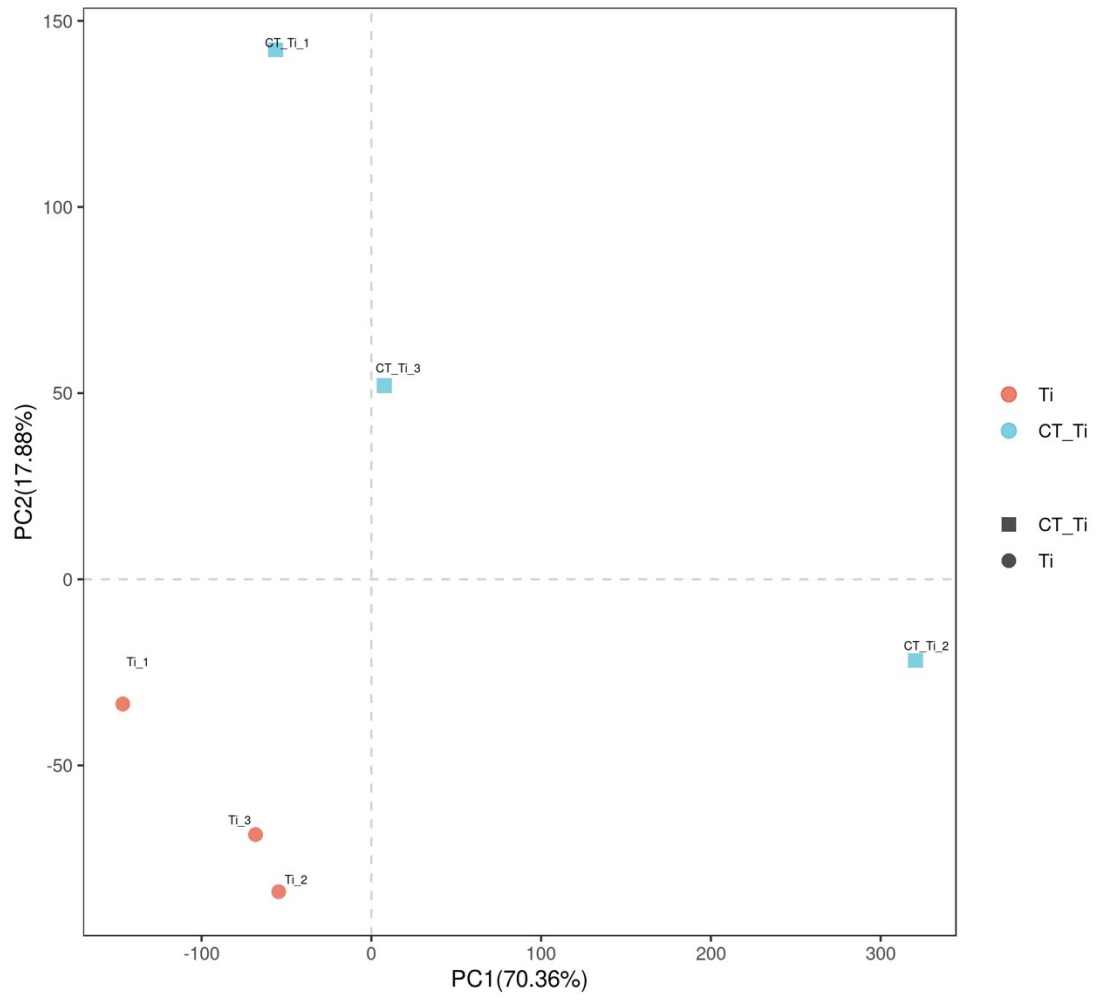

**Figure S4.** PCA (principal component analysis) plot for Ti and  $\text{Co}_3\text{O}_4/\text{TiO}_2\text{-Ti}$ . PCA plot shows PC1 and PC2 for all RNA-seq data of Ti and  $\text{Co}_3\text{O}_4/\text{TiO}_2\text{-Ti}$ .

OXIDATIVE PHOSPHORYLATION

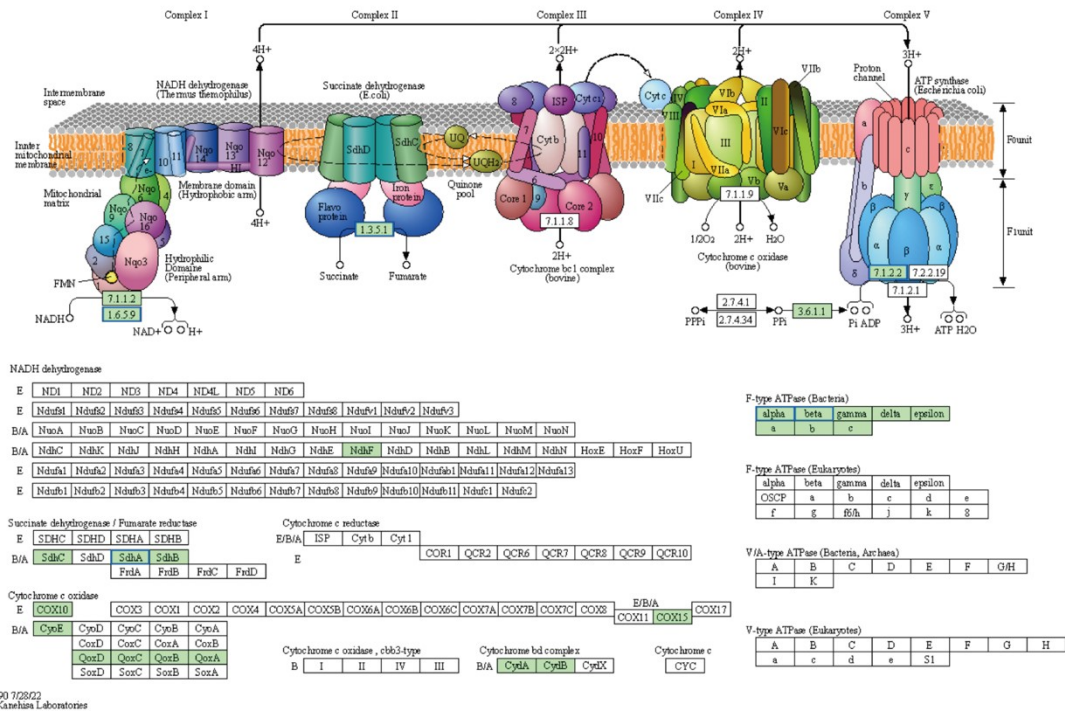

**Figure S5.** KEGG pathway data (OXIDATIVE PHOSPHORYLATION 1.6.5.9) of Ti, and Co<sub>3</sub>O<sub>4</sub>/TiO<sub>2</sub>-Ti.

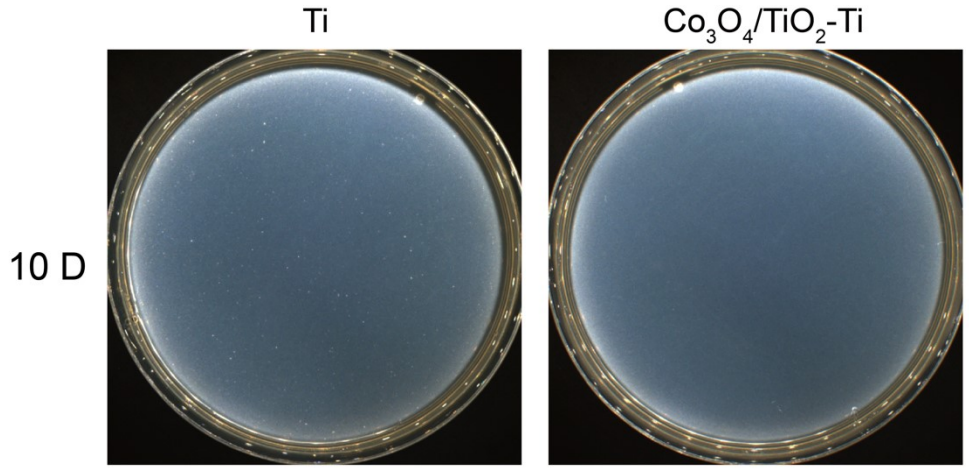

**Figure S6.** Representative images of *S. aureus* colonies after cultivation with Ti and Co<sub>3</sub>O<sub>4</sub>/TiO<sub>2</sub>-Ti and their antibacterial efficiency for 10 days.

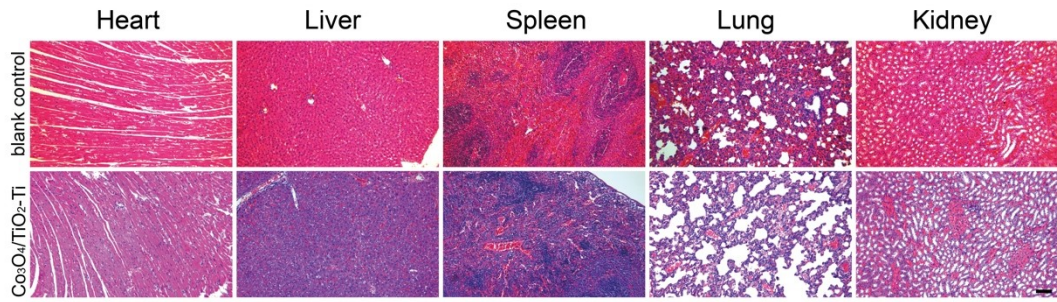

**Figure S7.** Biological assessment of heart, liver, spleen, lung, and kidney (n = 3). Scale bar: 100 $\mu$ m.
